# Supplementary material for: A fluorinated low-molecular-weight PEI/HIF-1α shRNA polyplex system for hemangioma therapy
Source: Royal Society of Chemistry journal article supplement (doi:10.1039/d0bm00171f), 2020-01-01
Supplement: d0bm00171f1.pdf [file d0bm00171f1.pdf]

### Electronic Supplementary Information

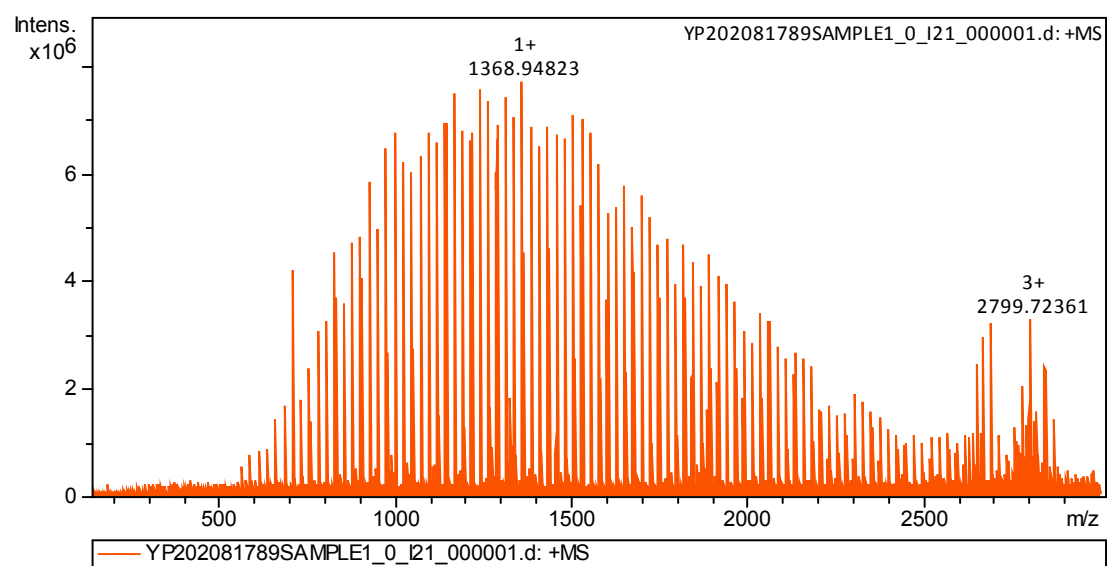

**Fig. S1.** The results of mass spectrometry experiments of PEI1.8k.
